# Supplementary material
Source: Frontiers journal article supplement (https://www.frontiersin.org/articles/133134)
Supplement: Presentation_1.PDF [file Presentation_1.PDF]

# Incorporating the soil environment and microbial community into plant competition theory

Po-Ju Ke<sup>1,2\*</sup>, Takeshi Miki<sup>2,3</sup>

\*Correspondence: Po-Ju Ke: pojuke@stanford.edu

## Supplementary Figure

The applicability of the revised soil-centered PSF index to a two-plant transplant experiment. All 24 possible scenarios of plant growth response are considered (Fig. S1-S4). The number marked on each plant represents the ranking of its growth response, with 1 representing the largest growth response. One can predict the competition outcome based on the growth response of plants. The competition outcome can be classified into four types: monoculture of plant A (Fig. S1), monoculture of plant B (Fig. S2), alternative stable state of either plant A or plant B (Fig. S3), and coexistence of both plant A and B (Fig. S4). The plant-centered PSF index for species  $i$ , calculated as  $\log(M_{ii}/M_{ij})$ , can only successfully predict the community outcomes in half of the scenarios (see Fig. S1-S4 legend for detail). The revised soil-centered PSF index for species  $i$ , calculated as  $\log(M_{ii}/M_{ji})$ , can successfully predict the community outcome in all scenarios.  $M_{ij}$  represents the growth response of plant species  $i$  in soil cultivated by plant species  $j$ . See main text for further description.

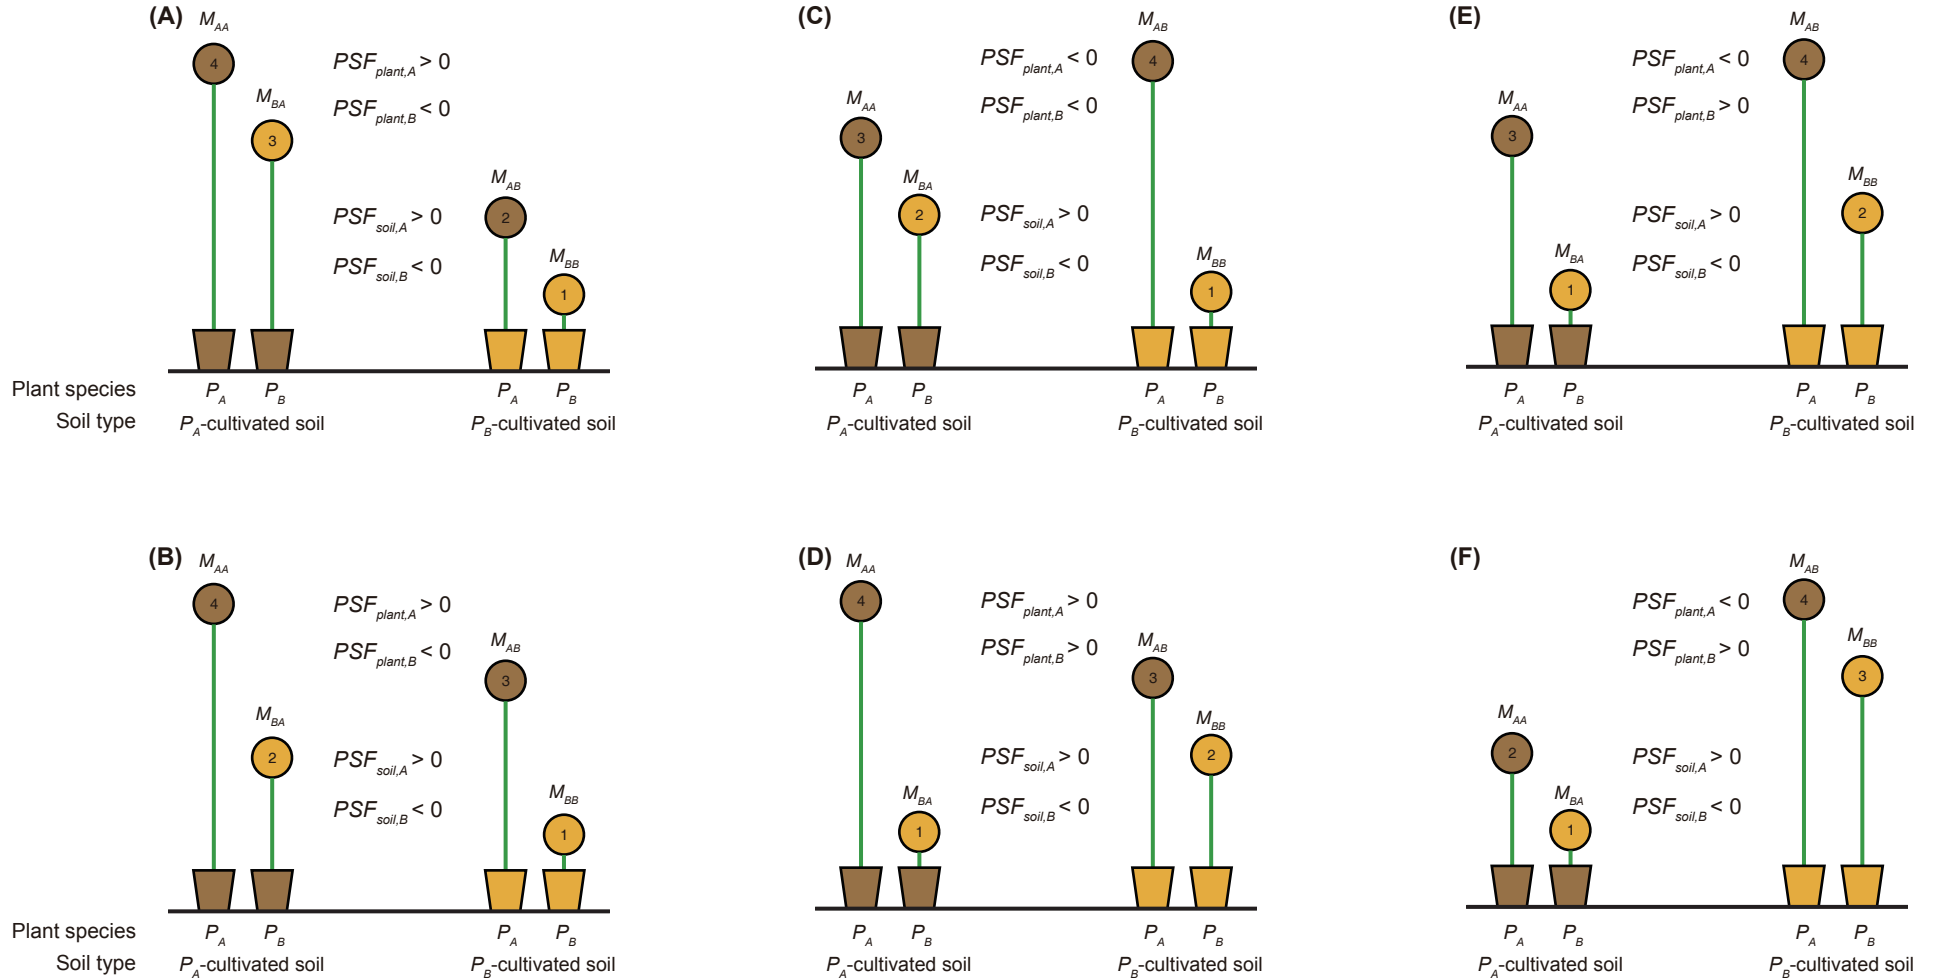

Fig. S1. The applicability of the revised soil-centered PSF index to a two-plant transplant experiment. All 6 possible plant growth scenarios that lead to the prediction of plant A monoculture are considered (panel A-F). The number marked on each plant represents the ranking of its growth response, with 1 representing the largest growth response. The expected feedback strength should be positive for plant A and negative for plant B. The plant-centered PSF index for species can only successfully predict the community outcomes in two scenarios (panel A and B). The revised soil-centered PSF index can successfully predict the community outcome in all scenarios (panel A-F). See main text for further description.

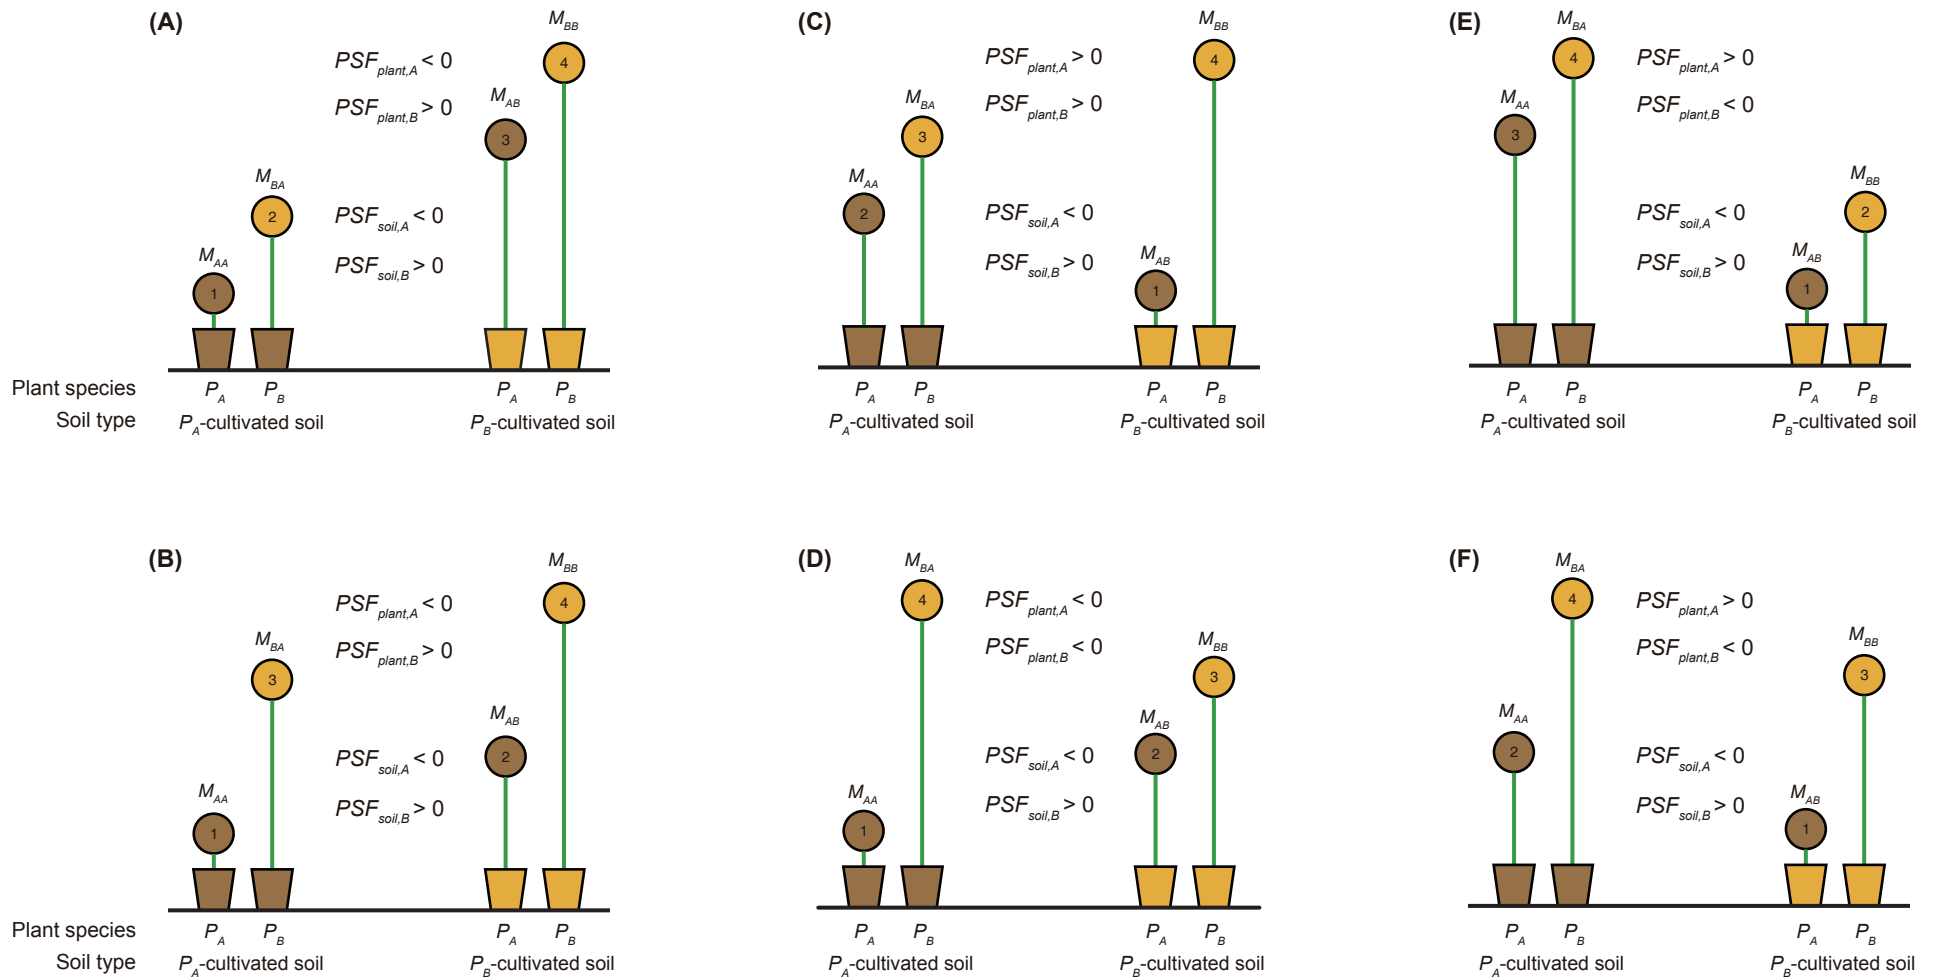

Fig. S2. The applicability of the revised soil-centered PSF index to a two-plant transplant experiment. All 6 possible plant growth scenarios that lead to the prediction of plant B monoculture are considered (panel A-F). The number marked on each plant represents the ranking of its growth response, with 1 representing the largest growth response. The expected feedback strength should be negative for plant A and positive for plant B. The plant-centered PSF index for species can only successfully predict the community outcomes in two scenarios (panel A and B). The revised soil-centered PSF index can successfully predict the community outcome in all scenarios (panel A-F). See main text for further description.

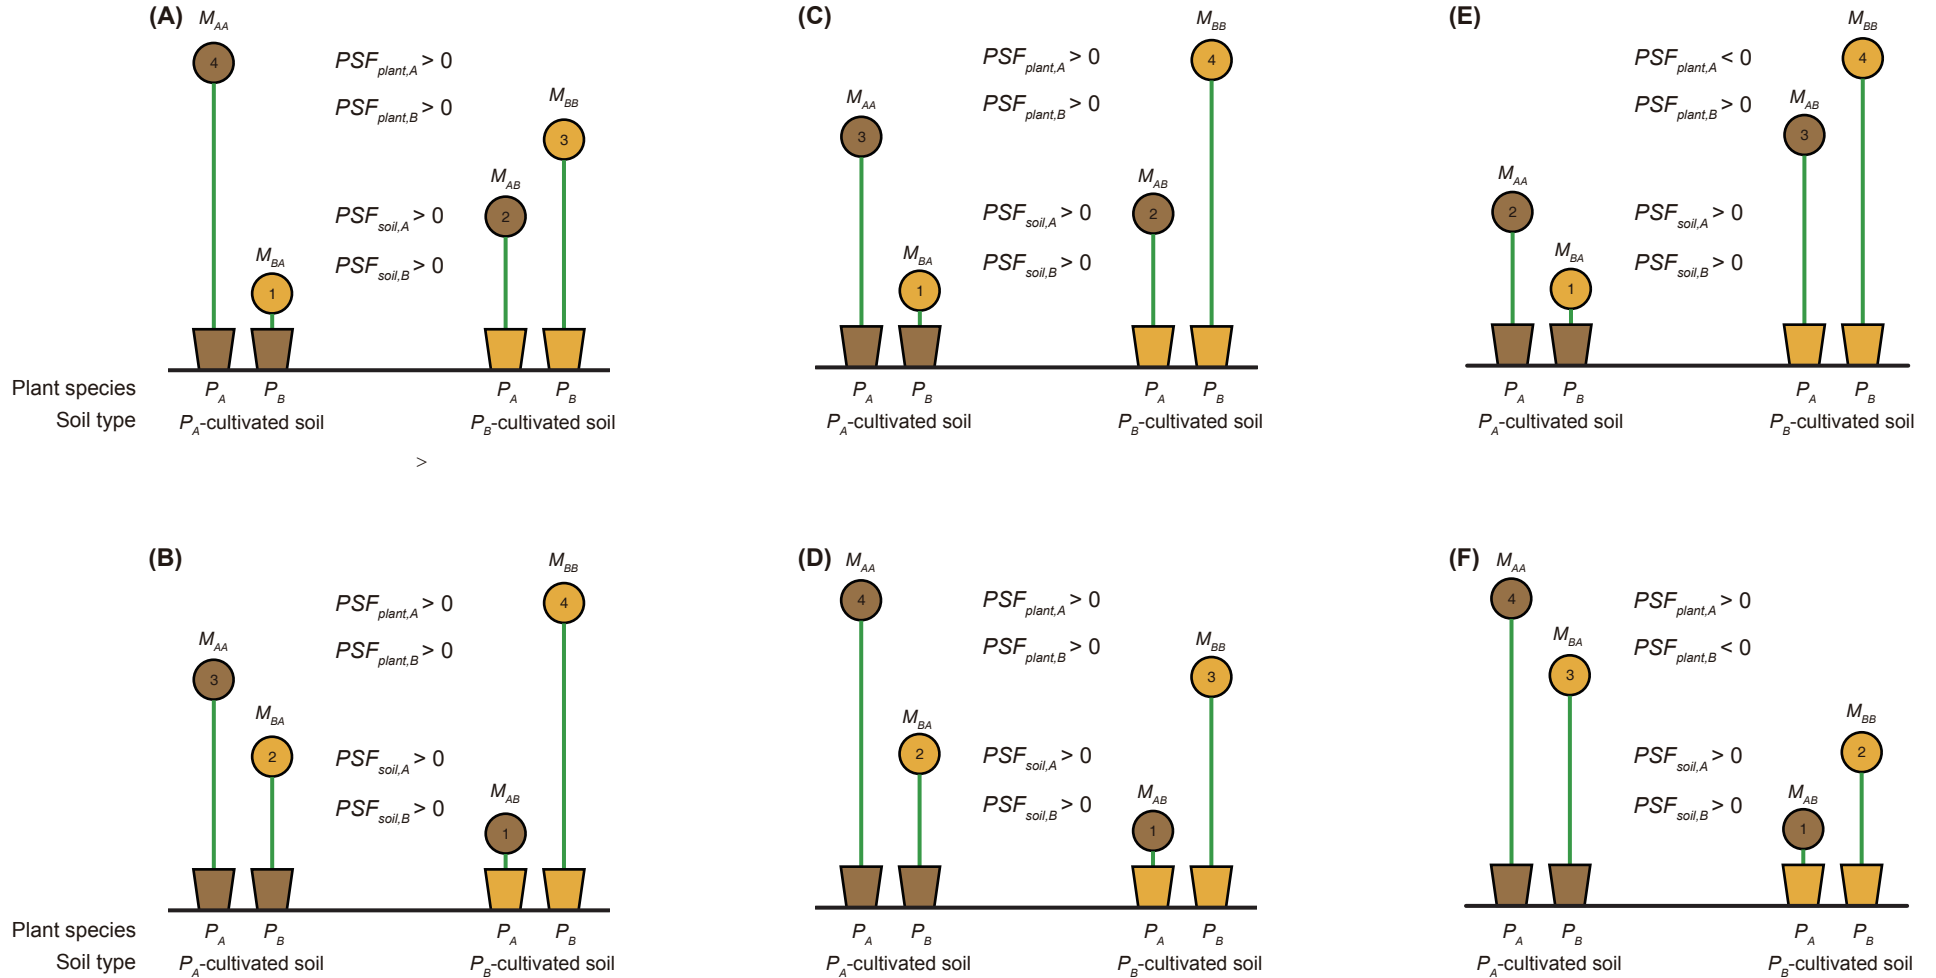

Fig. S3. The applicability of the revised soil-centered PSF index to a two-plant transplant experiment. All 6 possible plant growth scenarios that lead to the prediction of alternative stable states (i.e. monoculture of either plant A or plant B) are considered (panel A-F). The number marked on each plant represents the ranking of its growth response, with 1 representing the largest growth response. The expected feedback strength should be positive for plant A and positive for plant B. The plant-centered PSF index for species can only successfully predict the community outcomes in four scenarios (panel A-D). The revised soil-centered PSF index can successfully predict the community outcome in all scenarios (panel A-F). See main text for further description.

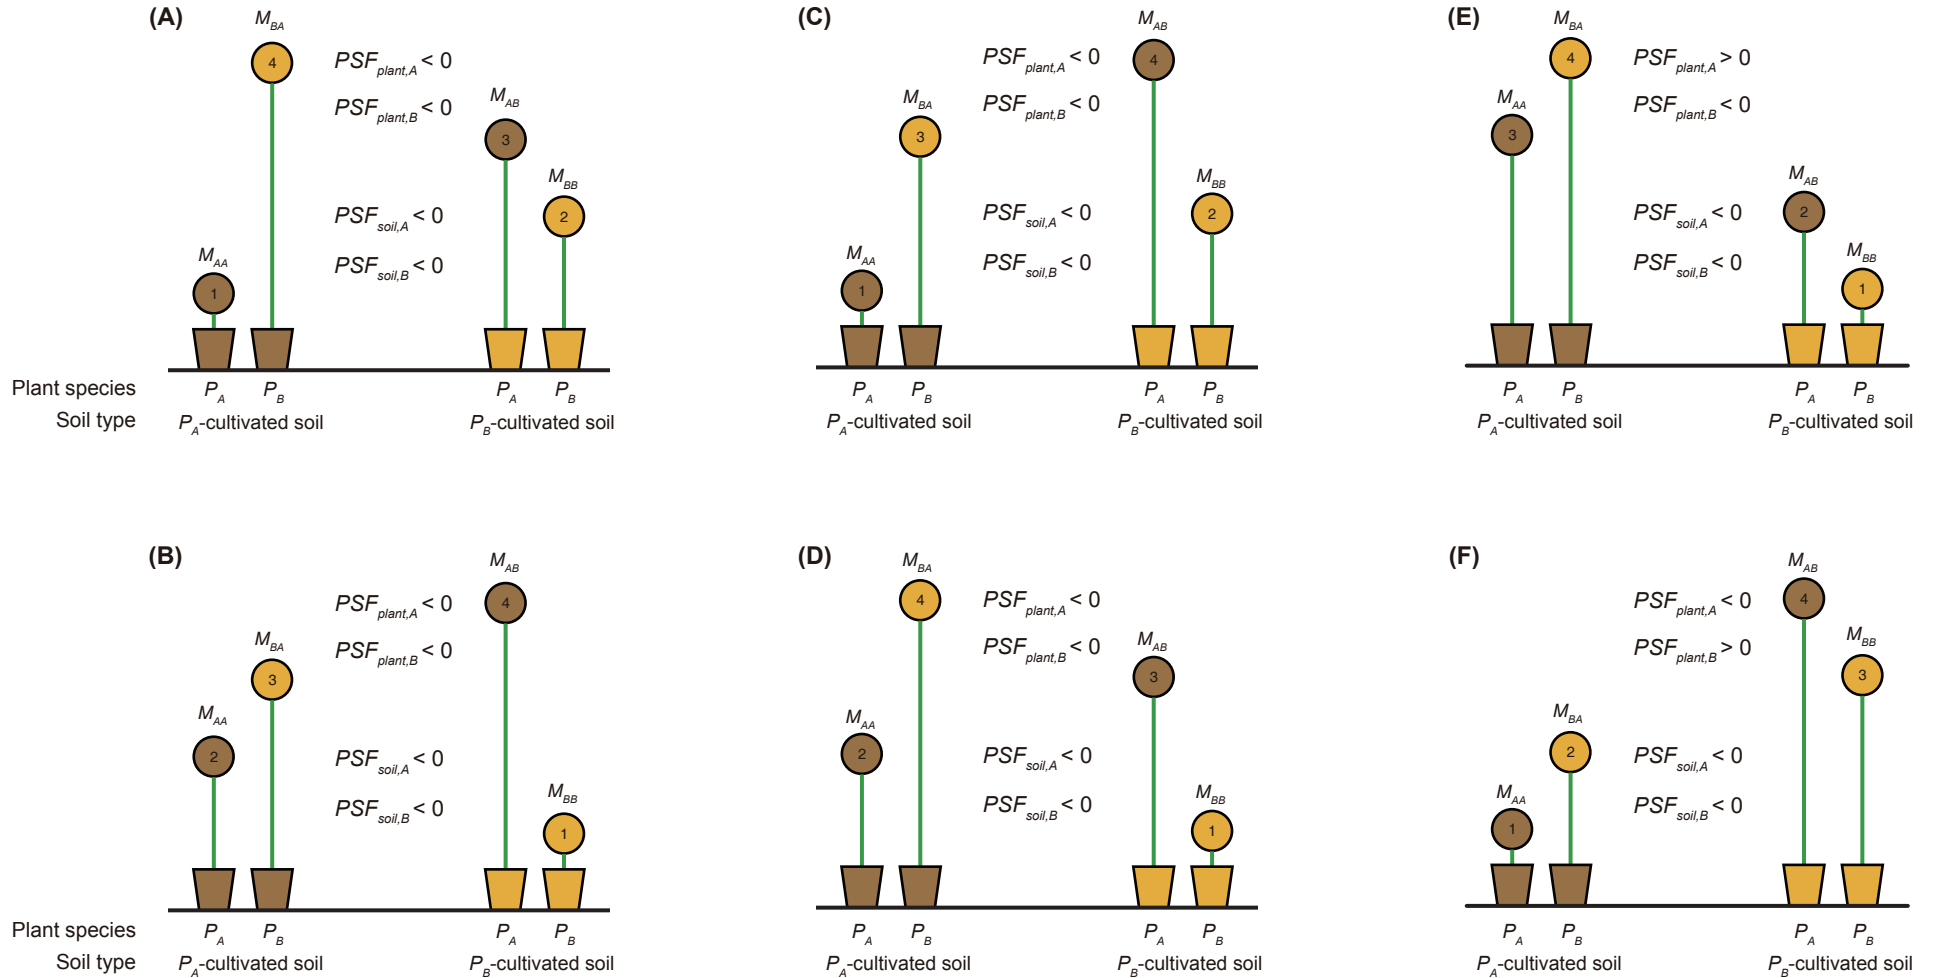

Fig. S4. The applicability of the revised soil-centered PSF index to a two-plant transplant experiment. All 6 possible plant growth scenarios that lead to the prediction of coexistence of both plant A and plant B are considered (panel A-F). The number marked on each plant represents the ranking of its growth response, with 1 representing the largest growth response. The expected feedback strength should be negative for plant A and negative for plant B. The plant-centered PSF index for species can only successfully predict the community outcomes in four scenarios (panel A-D). The revised soil-centered PSF index can successfully predict the community outcome in all scenarios (panel A-F). See main text for further description.
